# Supplementary material for: Comparative Mitogenome Analysis of Two Native Apple Snail Species (Ampullariidae, Pomacea) from Peruvian Amazon
Source: MDPI journal article supplement (doi:10.3390/genes14091769), 2023-09-07
Supplement: s1 [file s1]

**Supplementary Table S1.** Codon count and relative synonymous codon usage in the mitochondrial genome of *P. aulanieri*. The asterisk (\*) in the table indicates the stop codon.

| Codon  | Count | RSCU |
|--------|-------|------|--------|-------|------|--------|-------|------|--------|-------|------|
| UUU(F) | 297   | 1.73 | UCU(S) | 120   | 2.54 | UAU(Y) | 109   | 1.48 | UGU(C) | 25    | 1.28 |
| UUC(F) | 47    | 0.27 | UCC(S) | 31    | 0.66 | UAC(Y) | 38    | 0.52 | UGC(C) | 14    | 0.72 |
| UUA(L) | 321   | 3.13 | UCA(S) | 48    | 1.02 | UAA(*) | 9     | -    | UGA(W) | 68    | 1.3  |
| UUG(L) | 61    | 0.59 | UCG(S) | 7     | 0.13 | UAG(*) | 4     | -    | UGG(W) | 36    | 0.7  |
| CUU(L) | 91    | 0.89 | CCU(P) | 89    | 2.68 | CAU(H) | 60    | 1.48 | CGU(R) | 23    | 1.71 |
| CUC(L) | 30    | 0.29 | CCC(P) | 10    | 0.33 | CAC(H) | 21    | 0.52 | CGC(R) | 1     | 0.07 |
| CUA(L) | 83    | 0.81 | CCA(P) | 23    | 0.72 | CAA(Q) | 61    | 1.56 | CGA(R) | 27    | 1.93 |
| CUG(L) | 30    | 0.29 | CCG(P) | 9     | 0.27 | CAG(Q) | 17    | 0.44 | CGG(R) | 4     | 0.29 |
| AUU(I) | 248   | 1.66 | ACU(T) | 73    | 1.77 | AAU(N) | 102   | 1.51 | AGU(S) | 38    | 0.81 |
| AUC(I) | 51    | 0.34 | ACC(T) | 25    | 0.61 | AAC(N) | 33    | 0.49 | AGC(S) | 36    | 0.77 |
| AUA(M) | 150   | 1.52 | ACA(T) | 55    | 1.33 | AAA(K) | 75    | 1.54 | AGA(S) | 68    | 1.45 |
| AUG(M) | 48    | 0.48 | ACG(T) | 12    | 0.29 | AAG(K) | 23    | 0.46 | AGG(S) | 29    | 0.62 |
| GUU(V) | 109   | 1.76 | GCU(A) | 130   | 2.21 | GAU(D) | 59    | 1.51 | GGU(G) | 72    | 1.25 |
| GUC(V) | 29    | 0.47 | GCC(A) | 34    | 0.58 | GAC(D) | 20    | 0.49 | GGC(G) | 25    | 0.43 |
| GUA(V) | 76    | 1.21 | GCA(A) | 59    | 1    | GAA(E) | 55    | 1.41 | GGA(G) | 70    | 1.21 |
| GUG(V) | 35    | 0.56 | GCG(A) | 12    | 0.2  | GAG(E) | 23    | 0.59 | GGG(G) | 64    | 1.11 |
